# Supplementary material for: StCDPK3 Phosphorylates In Vitro Two Transcription Factors Involved in GA and ABA Signaling in Potato: StRSG1 and StABF1
Source: PubMed Central journal article supplement (PMC5131985; doi:10.1371/journal.pone.0167389), 2016-12-01
Supplement: pone.0167389.s002.pdf [file pone.0167389.s002.pdf]

**S1 Table. StRSG1 blast hits in the PGSC database**

Query: StRSG1 complete coding sequence

| Accession            | Description                        | Hit Score | E value   | Num HSPs | Top Query Cov (%) | Top Id (%) |
|----------------------|------------------------------------|-----------|-----------|----------|-------------------|------------|
| PGSC0003DMP400001527 | BZIP transcriptional activator RSG | 1792      | 0.0       | 1        | 100.00            | 100.00     |
| PGSC0003DMP400050715 | BZIP transcriptional activator RSG | 1317      | 0.0       | 1        | 77.35             | 96.96      |
| PGSC0003DMP400030704 | BZIP transcriptional activator     | 1194      | 1,00E-165 | 1        | 99.12             | 74.27      |
| PGSC0003DMP400050716 | BZIP transcriptional activator RSG | 897       | 1,00E-122 | 1        | 54.41             | 95.68      |
| PGSC0003DMP400029125 | Transcription factor RF2b          | 492       | 2,00E-59  | 1        | 75.00             | 49.62      |
| PGSC0003DMP400047996 | Transcription factor RF2b          | 471       | 5,00E-56  | 1        | 92.06             | 43.08      |
| PGSC0003DMP400002986 | DNA binding protein                | 458       | 5,00E-52  | 1        | 53.24             | 56.35      |
| PGSC0003DMP400006634 | Transcription factor VSF-1         | 409       | 7,00E-46  | 1        | 55.00             | 51.06      |
| PGSC0003DMP400021996 | Transcription factor RF2a          | 231       | 9,00E-22  | 1        | 28.24             | 47.92      |
| PGSC0003DMP400016592 | Transcription factor RF2a          | 226       | 6,00E-21  | 1        | 27.94             | 49.47      |

Query: StRSG1 b-ZIP domain

| Accession            | Description                        | Hit Score | E value  | Num HSPs | Top Query Cov | Top Id |
|----------------------|------------------------------------|-----------|----------|----------|---------------|--------|
| PGSC0003DMP400001527 | BZIP transcriptional activator RSG | 461       | 2,00E-58 | 1        | 100.00        | 100.00 |
| PGSC0003DMP400050715 | BZIP transcriptional activator RSG | 440       | 4,00E-56 | 1        | 100.00        | 96.74  |
| PGSC0003DMP400030704 | BZIP transcriptional activator     | 409       | 9,00E-51 | 1        | 100.00        | 89.13  |
| PGSC0003DMP400050716 | BZIP transcriptional activator RSG | 388       | 3,00E-49 | 1        | 88.04         | 95.06  |
| PGSC0003DMP400029125 | Transcription factor RF2b          | 358       | 4,00E-43 | 1        | 100.00        | 78.26  |
| PGSC0003DMP400002986 | DNA binding protein                | 367       | 1,00E-42 | 1        | 100.00        | 78.26  |
| PGSC0003DMP400047996 | Transcription factor RF2b          | 346       | 5,00E-41 | 1        | 100.00        | 75.00  |
| PGSC0003DMP400006634 | Transcription factor VSF-1         | 303       | 3,00E-34 | 1        | 100           | 67.39  |
| PGSC0003DMP400016592 | Transcription factor RF2a          | 209       | 3,00E-21 | 1        | 100.00        | 51.09  |
| PGSC0003DMP400021996 | Transcription factor RF2a          | 207       | 4,00E-21 | 1        | 100.00        | 50.00  |

StRSG1 complete protein sequence (upper chart) or its bzip domain (lower chart) were blasted (BLASTP 2.2.26) against the PGSC DM v3.4 pep.fasta database (<http://solanaceae.plantbiology.msu.edu/blast.shtml>). Q coverage and identities are shown.
